# Supplementary material for: Prediction of the age at onset in spinocerebellar ataxia type 1, 2, 3 and 6
Source: PubMed Central journal article supplement — J Med Genet. 2014 Apr 29;51(7):479–86. doi: 10.1136/jmedgenet-2013-102200 (PMC4078703; doi:10.1136/jmedgenet-2013-102200), 2014-04-29
Supplement: jmedgenet-2013-102200-s1.pdf [file jmedgenet-2013-102200-s1.pdf]

## Supplementary Data

**Table 1: Covariance parameters**

| SCA genotype | Intercept –<br>Expanded allele | Intercept –<br>Shorter allele | Expanded allele –<br>Shorter allele |
|--------------|--------------------------------|-------------------------------|-------------------------------------|
| SCA1         | -1.890 E <sup>-4</sup>         | -9.280 E <sup>-4</sup>        | 6.360 E <sup>-7</sup>               |
| SCA2         | -8.250 E <sup>-4</sup>         |                               |                                     |
| SCA3         | -5.020 E <sup>-4</sup>         |                               |                                     |
| SCA6         | -2.163 E <sup>-3</sup>         | -1.837 E <sup>-3</sup>        | 2.331 E <sup>-5</sup>               |

**Table 2A: SCA1: Expected age at onset (median [90%CR]) from birth and for different current age according to the genotype**

| CAG Repeat | At birth           |                    |                    |                    | Current Age        |                    |                    |                    |  |
|------------|--------------------|--------------------|--------------------|--------------------|--------------------|--------------------|--------------------|--------------------|--|
|            | 20                 | 25                 | 30                 | 35                 | 40                 | 45                 | 50                 |                    |  |
| 26 40      | 48.9 [36.5 - 65.5] | 48.9 [36.5 - 65.5] | 48.9 [36.6 - 65.5] | 48.9 [36.7 - 65.5] | 49.2 [38 - 65.6]   | 50.3 [41.4 - 66.2] | 52.6 [45.8 - 67.6] | 55.9 [50.5 - 69.8] |  |
| 26 42      | 44.4 [33.2 - 59.3] | 44.4 [33.2 - 59.3] | 44.4 [33.2 - 59.3] | 44.5 [33.8 - 59.4] | 45.3 [36.5 - 59.8] | 47.3 [40.7 - 61]   | 50.4 [45.5 - 63.1] | 54.4 [50.4 - 66]   |  |
| 26 44      | 40.2 [30.1 - 53.8] | 40.2 [30.1 - 53.8] | 40.3 [30.3 - 53.8] | 40.7 [32 - 54]     | 42.2 [35.8 - 54.9] | 45.2 [40.5 - 56.8] | 49 [45.3 - 59.6]   | 53.4 [50.3 - 63.1] |  |
| 26 46      | 36.5 [27.3 - 48.8] | 36.5 [27.3 - 48.8] | 36.6 [28 - 48.9]   | 37.6 [31 - 49.4]   | 40.1 [35.5 - 50.9] | 43.8 [40.3 - 53.5] | 48.1 [45.2 - 56.9] | 52.7 [50.2 - 60.9] |  |
| 26 48      | 33.1 [24.8 - 44.3] | 33.1 [24.9 - 44.3] | 33.5 [26.5 - 44.5] | 35.3 [30.5 - 45.5] | 38.7 [35.3 - 47.8] | 42.9 [40.2 - 51]   | 47.5 [45.2 - 54.9] | 52.2 [50.2 - 59.3] |  |
| 26 50      | 30 [22.5 - 40.2]   | 30.1 [22.8 - 40.2] | 31.1 [25.8 - 40.7] | 33.8 [30.3 - 42.4] | 37.8 [35.2 - 45.4] | 42.3 [40.2 - 49.2] | 47.1 [45.2 - 53.4] | 51.9 [50.1 - 58]   |  |
| 26 52      | 27.2 [20.4 - 36.4] | 27.5 [21.5 - 36.6] | 29.3 [25.4 - 37.6] | 32.8 [30.2 - 40]   | 37.2 [35.2 - 43.6] | 41.9 [40.1 - 47.8] | 46.7 [45.1 - 52.3] | 51.6 [50.1 - 57]   |  |
| 26 54      | 24.7 [18.5 - 33.1] | 25.4 [20.7 - 33.4] | 28.1 [25.3 - 35.1] | 32.2 [30.2 - 38.2] | 36.8 [35.1 - 42.2] | 41.6 [40.1 - 46.7] | 46.5 [45.1 - 51.4] | 51.5 [50.1 - 56.2] |  |
| 26 56      | 22.4 [16.8 - 30]   | 23.8 [20.4 - 30.8] | 27.3 [25.2 - 33.2] | 31.7 [30.1 - 36.9] | 36.5 [35.1 - 41.2] | 41.4 [40.1 - 45.8] | 46.3 [45.1 - 50.7] | 51.3 [50.1 - 55.6] |  |
| 26 58      | 20.3 [15.2 - 27.2] | 22.7 [20.2 - 28.6] | 26.8 [25.1 - 31.7] | 31.4 [30.1 - 35.8] | 36.3 [35.1 - 40.4] | 41.2 [40.1 - 45.2] | 46.2 [45.1 - 50.1] | 51.2 [50.1 - 55.1] |  |
| 26 60      | 18.4 [13.8 - 24.7] | 22 [20.2 - 27]     | 26.4 [25.1 - 30.6] | 31.2 [30.1 - 35]   | 36.1 [35.1 - 39.8] | 41.1 [40.1 - 44.6] | 46.1 [45.1 - 49.6] | 51.1 [50.1 - 54.6] |  |
| 26 62      | 16.7 [12.5 - 22.4] | 21.5 [20.1 - 25.7] | 26.2 [25.1 - 29.8] | 31 [30.1 - 34.4]   | 36 [35.1 - 39.3]   | 41 [40.1 - 44.2]   | 46 [45.1 - 49.2]   | 51 [50.1 - 54.3]   |  |
| 28 40      | 50.2 [37.6 - 67.1] | 50.2 [37.6 - 67.1] | 50.2 [37.6 - 67.1] | 50.2 [37.7 - 67.1] | 50.4 [38.7 - 67.2] | 51.3 [41.6 - 67.7] | 53.3 [45.9 - 68.8] | 56.4 [50.6 - 70.8] |  |
| 28 42      | 45.6 [34.1 - 60.8] | 45.6 [34.1 - 60.8] | 45.6 [34.1 - 60.8] | 45.6 [34.6 - 60.9] | 46.2 [36.8 - 61.2] | 48 [40.9 - 62.2]   | 50.9 [45.5 - 64]   | 54.7 [50.4 - 66.7] |  |
| 28 44      | 41.3 [31 - 55.2]   | 41.3 [31 - 55.2]   | 41.3 [31.1 - 55.2] | 41.6 [32.4 - 55.3] | 42.9 [35.9 - 56]   | 45.6 [40.5 - 57.7] | 49.3 [45.4 - 60.3] | 53.6 [50.3 - 63.6] |  |
| 28 46      | 37.5 [28.1 - 50]   | 37.5 [28.1 - 50]   | 37.6 [28.5 - 50.1] | 38.3 [31.2 - 50.5] | 40.6 [35.5 - 51.8] | 44.1 [40.3 - 54.2] | 48.3 [45.3 - 57.5] | 52.8 [50.2 - 61.3] |  |
| 28 48      | 34 [25.5 - 45.4]   | 34 [25.5 - 45.4]   | 34.3 [26.8 - 45.5] | 35.9 [30.6 - 46.4] | 39 [35.3 - 48.5]   | 43.1 [40.2 - 51.5] | 47.6 [45.2 - 55.3] | 52.3 [50.2 - 59.6] |  |
| 28 50      | 30.8 [23.1 - 41.2] | 30.9 [23.4 - 41.2] | 31.6 [25.9 - 41.6] | 34.1 [30.4 - 43.1] | 38 [35.2 - 45.9]   | 42.4 [40.2 - 49.5] | 47.1 [45.2 - 53.7] | 52 [50.1 - 58.2]   |  |
| 28 52      | 28 [21 - 37.4]     | 28.2 [21.8 - 37.4] | 29.7 [25.5 - 38.3] | 33 [30.3 - 40.6]   | 37.3 [35.2 - 44]   | 42 [40.1 - 48]     | 46.8 [45.1 - 52.5] | 51.7 [50.1 - 57.2] |  |
| 28 54      | 25.4 [19 - 33.9]   | 25.9 [20.9 - 34.2] | 28.3 [25.3 - 35.6] | 32.3 [30.2 - 38.6] | 36.9 [35.1 - 42.5] | 41.7 [40.1 - 46.9] | 46.5 [45.1 - 51.5] | 51.5 [50.1 - 56.3] |  |
| 28 56      | 23 [17.2 - 30.8]   | 24.1 [20.5 - 31.4] | 27.4 [25.2 - 33.6] | 31.8 [30.1 - 37.1] | 36.5 [35.1 - 41.4] | 41.4 [40.1 - 46]   | 46.4 [45.1 - 50.8] | 51.3 [50.1 - 55.7] |  |
| 28 58      | 20.9 [15.6 - 27.9] | 22.9 [20.3 - 29.1] | 26.9 [25.1 - 32]   | 31.5 [30.1 - 36]   | 36.3 [35.1 - 40.5] | 41.2 [40.1 - 45.3] | 46.2 [45.1 - 50.2] | 51.2 [50.1 - 55.1] |  |
| 28 60      | 18.9 [14.2 - 25.3] | 22.1 [20.2 - 27.4] | 26.5 [25.1 - 30.9] | 31.2 [30.1 - 35.2] | 36.1 [35.1 - 39.9] | 41.1 [40.1 - 44.7] | 46.1 [45.1 - 49.7] | 51.1 [50.1 - 54.7] |  |
| 28 62      | 17.2 [12.8 - 23]   | 21.6 [20.1 - 26]   | 26.2 [25.1 - 30]   | 31.1 [30.1 - 34.5] | 36 [35.1 - 39.3]   | 41 [40.1 - 44.3]   | 46 [45.1 - 49.3]   | 51 [50.1 - 54.3]   |  |
| 30 40      | 51.6 [38.6 - 68.8] | 51.6 [38.6 - 68.8] | 51.6 [38.6 - 68.8] | 51.6 [38.7 - 68.8] | 51.7 [39.4 - 68.9] | 52.4 [42 - 69.3]   | 54.1 [46 - 70.3]   | 57 [50.6 - 72]     |  |
| 30 42      | 46.8 [35.1 - 62.4] | 46.8 [35.1 - 62.4] | 46.8 [35.1 - 62.4] | 46.8 [35.4 - 62.4] | 47.3 [37.2 - 62.7] | 48.8 [41 - 63.5]   | 51.4 [45.6 - 65.2] | 55.1 [50.4 - 67.7] |  |
| 30 44      | 42.4 [31.8 - 56.6] | 42.4 [31.8 - 56.6] | 42.4 [31.9 - 56.6] | 42.7 [32.9 - 56.7] | 43.7 [36.1 - 57.3] | 46.1 [40.6 - 58.8] | 49.7 [45.4 - 61.2] | 53.8 [50.3 - 64.3] |  |
| 30 46      | 38.5 [28.9 - 51.3] | 38.5 [28.9 - 51.3] | 38.6 [29.2 - 51.4] | 39.2 [31.4 - 51.7] | 41.1 [35.6 - 52.8] | 44.4 [40.4 - 55]   | 48.5 [45.3 - 58.1] | 53 [50.2 - 61.8]   |  |
| 30 48      | 34.9 [26.2 - 46.6] | 34.9 [26.2 - 46.6] | 35.1 [27.2 - 46.7] | 36.4 [30.7 - 47.4] | 39.4 [35.4 - 49.2] | 43.3 [40.3 - 52.2] | 47.8 [45.2 - 55.8] | 52.4 [50.2 - 60]   |  |
| 30 50      | 31.7 [23.7 - 42.2] | 31.7 [23.9 - 42.3] | 32.3 [26.1 - 42.6] | 34.5 [30.4 - 43.9] | 38.2 [35.3 - 46.5] | 42.6 [40.2 - 50]   | 47.2 [45.2 - 54.1] | 52 [50.2 - 58.5]   |  |
| 30 52      | 28.7 [21.5 - 38.3] | 28.9 [22.1 - 38.4] | 30.1 [25.6 - 39.1] | 33.3 [30.3 - 41.2] | 37.5 [35.2 - 44.4] | 42.1 [40.2 - 48.4] | 46.9 [45.1 - 52.8] | 51.8 [50.1 - 57.4] |  |
| 30 54      | 26.1 [19.5 - 34.8] | 26.4 [21.1 - 35]   | 28.6 [25.3 - 36.3] | 32.5 [30.2 - 39.1] | 37 [35.2 - 42.8]   | 41.7 [40.1 - 47.1] | 46.6 [45.1 - 51.7] | 51.5 [50.1 - 56.5] |  |
| 30 56      | 23.6 [17.7 - 31.6] | 24.6 [20.5 - 32.1] | 27.6 [25.2 - 34.1] | 31.9 [30.1 - 37.5] | 36.6 [35.1 - 41.6] | 41.5 [40.1 - 46.2] | 46.4 [45.1 - 51]   | 51.4 [50.1 - 55.8] |  |

|       |                    |                    |                    |                    |                    |                    |                    |                    |
|-------|--------------------|--------------------|--------------------|--------------------|--------------------|--------------------|--------------------|--------------------|
| 30 58 | 21.4 [16.1 - 28.7] | 23.2 [20.3 - 29.7] | 27 [25.2 - 32.4]   | 31.6 [30.1 - 36.3] | 36.4 [35.1 - 40.7] | 41.3 [40.1 - 45.5] | 46.2 [45.1 - 50.3] | 51.2 [50.1 - 55.3] |
| 30 60 | 19.5 [14.5 - 26]   | 22.3 [20.2 - 27.8] | 26.6 [25.1 - 31.1] | 31.3 [30.1 - 35.4] | 36.2 [35.1 - 40]   | 41.1 [40.1 - 44.9] | 46.1 [45.1 - 49.8] | 51.1 [50.1 - 54.8] |
| 30 62 | 17.6 [13.2 - 23.6] | 21.7 [20.1 - 26.3] | 26.3 [25.1 - 30.2] | 31.1 [30.1 - 34.7] | 36 [35.1 - 39.5]   | 41 [40.1 - 44.4]   | 46 [45.1 - 49.4]   | 51 [50.1 - 54.4]   |
| 32 40 | 53 [39.7 - 70.7]   | 53 [39.7 - 70.7]   | 53 [39.7 - 70.7]   | 53 [39.7 - 70.7]   | 53.1 [40.2 - 70.8] | 53.6 [42.4 - 71.1] | 55.1 [46.2 - 71.9] | 57.7 [50.7 - 73.4] |
| 32 42 | 48 [36 - 64.1]     | 48 [36 - 64.1]     | 48 [36 - 64.1]     | 48.1 [36.2 - 64.1] | 48.4 [37.7 - 64.3] | 49.6 [41.2 - 65]   | 52.1 [45.7 - 66.5] | 55.5 [50.5 - 68.8] |
| 32 44 | 43.6 [32.7 - 58.2] | 43.6 [32.7 - 58.2] | 43.6 [32.7 - 58.2] | 43.7 [33.5 - 58.2] | 44.6 [36.3 - 58.7] | 46.8 [40.7 - 60]   | 50.1 [45.4 - 62.2] | 54.1 [50.3 - 65.2] |
| 32 46 | 39.5 [29.6 - 52.7] | 39.5 [29.6 - 52.7] | 39.6 [29.8 - 52.8] | 40 [31.7 - 53]     | 41.7 [35.7 - 54]   | 44.8 [40.4 - 56]   | 48.8 [45.3 - 58.9] | 53.2 [50.2 - 62.5] |
| 32 48 | 35.9 [26.9 - 47.8] | 35.9 [26.9 - 47.8] | 36 [27.6 - 47.9]   | 37.1 [30.9 - 48.5] | 39.8 [35.4 - 50.2] | 43.6 [40.3 - 52.9] | 47.9 [45.2 - 56.4] | 52.6 [50.2 - 60.4] |
| 32 50 | 32.5 [24.4 - 43.4] | 32.5 [24.5 - 43.4] | 33 [26.3 - 43.7]   | 35 [30.5 - 44.8]   | 38.5 [35.3 - 47.2] | 42.8 [40.2 - 50.6] | 47.4 [45.2 - 54.5] | 52.1 [50.2 - 58.9] |
| 32 52 | 29.5 [22.1 - 39.4] | 29.6 [22.5 - 39.4] | 30.7 [25.7 - 40]   | 33.6 [30.3 - 41.9] | 37.6 [35.2 - 44.9] | 42.2 [40.2 - 48.8] | 47 [45.1 - 53.1]   | 51.8 [50.1 - 57.7] |
| 32 54 | 26.8 [20 - 35.7]   | 27.1 [21.3 - 35.9] | 29 [25.4 - 37]     | 32.7 [30.2 - 39.6] | 37.1 [35.2 - 43.2] | 41.8 [40.1 - 47.5] | 46.7 [45.1 - 52]   | 51.6 [50.1 - 56.8] |
| 32 56 | 24.3 [18.2 - 32.4] | 25 [20.6 - 32.8]   | 27.9 [25.2 - 34.7] | 32.1 [30.2 - 37.9] | 36.7 [35.1 - 42]   | 41.5 [40.1 - 46.5] | 46.5 [45.1 - 51.2] | 51.4 [50.1 - 56]   |
| 32 58 | 22 [16.5 - 29.4]   | 23.5 [20.4 - 30.3] | 27.1 [25.2 - 32.8] | 31.6 [30.1 - 36.6] | 36.4 [35.1 - 41]   | 41.3 [40.1 - 45.7] | 46.3 [45.1 - 50.5] | 51.3 [50.1 - 55.4] |
| 32 60 | 20 [14.9 - 26.7]   | 22.5 [20.2 - 28.3] | 26.7 [25.1 - 31.5] | 31.4 [30.1 - 35.6] | 36.2 [35.1 - 40.2] | 41.2 [40.1 - 45]   | 46.2 [45.1 - 50]   | 51.1 [50.1 - 54.9] |
| 32 62 | 18.1 [13.5 - 24.3] | 21.9 [20.2 - 26.7] | 26.4 [25.1 - 30.4] | 31.2 [30.1 - 34.9] | 36.1 [35.1 - 39.6] | 41.1 [40.1 - 44.5] | 46 [45.1 - 49.5]   | 51 [50.1 - 54.5]   |
| 34 40 | 54.4 [40.7 - 72.7] | 54.4 [40.7 - 72.7] | 54.4 [40.7 - 72.7] | 54.4 [40.7 - 72.7] | 54.5 [41.1 - 72.8] | 54.9 [42.9 - 73]   | 56.1 [46.4 - 73.7] | 58.5 [50.8 - 75.1] |
| 34 42 | 49.3 [36.9 - 65.9] | 49.3 [36.9 - 65.9] | 49.3 [36.9 - 65.9] | 49.4 [37 - 66]     | 49.6 [38.2 - 66.1] | 50.6 [41.4 - 66.6] | 52.8 [45.8 - 67.9] | 56 [50.5 - 70]     |
| 34 44 | 44.7 [33.5 - 59.8] | 44.7 [33.5 - 59.8] | 44.8 [33.5 - 59.8] | 44.9 [34.1 - 59.9] | 45.6 [36.6 - 60.2] | 47.5 [40.8 - 61.3] | 50.6 [45.5 - 63.3] | 54.5 [50.4 - 66.2] |
| 34 46 | 40.6 [30.4 - 54.2] | 40.6 [30.4 - 54.2] | 40.6 [30.5 - 54.3] | 41 [32.1 - 54.4]   | 42.4 [35.8 - 55.3] | 45.3 [40.5 - 57.1] | 49.1 [45.3 - 59.8] | 53.5 [50.3 - 63.3] |
| 34 48 | 36.8 [27.6 - 49.2] | 36.8 [27.6 - 49.2] | 36.9 [28.1 - 49.3] | 37.8 [31 - 49.8]   | 40.3 [35.5 - 51.2] | 43.9 [40.3 - 53.7] | 48.2 [45.2 - 57.1] | 52.8 [50.2 - 61]   |
| 34 50 | 33.4 [25 - 44.6]   | 33.4 [25.1 - 44.6] | 33.8 [26.6 - 44.8] | 35.5 [30.6 - 45.8] | 38.8 [35.3 - 48]   | 43 [40.2 - 51.2]   | 47.5 [45.2 - 55.1] | 52.3 [50.2 - 59.4] |
| 34 52 | 30.3 [22.7 - 40.5] | 30.4 [23 - 40.5]   | 31.2 [25.8 - 41]   | 33.9 [30.3 - 42.7] | 37.9 [35.2 - 45.6] | 42.4 [40.2 - 49.3] | 47.1 [45.2 - 53.6] | 51.9 [50.1 - 58.1] |
| 34 54 | 27.5 [20.5 - 36.8] | 27.7 [21.5 - 36.9] | 29.4 [25.4 - 37.8] | 32.9 [30.2 - 40.2] | 37.2 [35.2 - 43.7] | 41.9 [40.1 - 47.9] | 46.8 [45.1 - 52.4] | 51.7 [50.1 - 57.1] |
| 34 56 | 24.9 [18.6 - 33.4] | 25.5 [20.8 - 33.7] | 28.1 [25.3 - 35.3] | 32.2 [30.2 - 38.4] | 36.8 [35.1 - 42.4] | 41.6 [40.1 - 46.8] | 46.5 [45.1 - 51.5] | 51.5 [50.1 - 56.3] |
| 34 58 | 22.6 [16.9 - 30.3] | 23.9 [20.4 - 31]   | 27.3 [25.2 - 33.4] | 31.8 [30.1 - 37]   | 36.5 [35.1 - 41.3] | 41.4 [40.1 - 45.9] | 46.3 [45.1 - 50.7] | 51.3 [50.1 - 55.7] |
| 34 60 | 20.5 [15.3 - 27.5] | 22.8 [20.3 - 28.8] | 26.8 [25.1 - 31.9] | 31.5 [30.1 - 35.9] | 36.3 [35.1 - 40.5] | 41.2 [40.1 - 45.3] | 46.2 [45.1 - 50.2] | 51.2 [50.1 - 55.1] |
| 34 62 | 18.6 [13.9 - 25]   | 22 [20.2 - 27.2]   | 26.4 [25.1 - 30.8] | 31.2 [30.1 - 35.1] | 36.1 [35.1 - 39.8] | 41.1 [40.1 - 44.7] | 46.1 [45.1 - 49.7] | 51.1 [50.1 - 54.7] |
| 36 40 | 55.8 [41.7 - 74.9] | 55.8 [41.7 - 74.9] | 55.8 [41.7 - 74.9] | 55.8 [41.7 - 74.9] | 55.9 [41.9 - 74.9] | 56.2 [43.4 - 75.1] | 57.3 [46.7 - 75.6] | 59.4 [51 - 76.9]   |
| 36 42 | 50.7 [37.8 - 67.9] | 50.7 [37.8 - 67.9] | 50.7 [37.8 - 67.9] | 50.7 [37.9 - 67.9] | 50.9 [38.8 - 68]   | 51.7 [41.7 - 68.5] | 53.7 [45.9 - 69.6] | 56.7 [50.6 - 71.5] |
| 36 44 | 46 [34.3 - 61.6]   | 46 [34.3 - 61.6]   | 46 [34.3 - 61.6]   | 46 [34.7 - 61.6]   | 46.6 [36.9 - 61.9] | 48.3 [40.9 - 62.9] | 51.2 [45.6 - 64.7] | 54.9 [50.4 - 67.3] |
| 36 46 | 41.7 [31.1 - 55.9] | 41.7 [31.1 - 55.9] | 41.7 [31.2 - 55.9] | 42 [32.5 - 56]     | 43.2 [36 - 56.7]   | 45.9 [40.5 - 58.3] | 49.5 [45.4 - 60.9] | 53.7 [50.3 - 64.2] |
| 36 48 | 37.8 [28.2 - 50.7] | 37.8 [28.2 - 50.7] | 37.9 [28.7 - 50.7] | 38.6 [31.2 - 51.1] | 40.8 [35.6 - 52.4] | 44.3 [40.4 - 54.7] | 48.4 [45.3 - 58]   | 53 [50.2 - 61.8]   |
| 36 50 | 34.3 [25.6 - 46]   | 34.3 [25.6 - 46]   | 34.6 [26.9 - 46.1] | 36.1 [30.7 - 47]   | 39.2 [35.4 - 49]   | 43.2 [40.3 - 52]   | 47.7 [45.2 - 55.8] | 52.4 [50.2 - 59.9] |
| 36 52 | 31.1 [23.2 - 41.7] | 31.2 [23.4 - 41.7] | 31.9 [26 - 42.1]   | 34.3 [30.4 - 43.6] | 38.1 [35.3 - 46.3] | 42.5 [40.2 - 49.9] | 47.2 [45.2 - 54.1] | 52 [50.2 - 58.6]   |
| 36 54 | 28.2 [21 - 37.9]   | 28.4 [21.8 - 37.9] | 29.9 [25.5 - 38.8] | 33.2 [30.3 - 41]   | 37.4 [35.2 - 44.3] | 42.1 [40.2 - 48.4] | 46.9 [45.1 - 52.8] | 51.8 [50.1 - 57.5] |
| 36 56 | 25.6 [19.1 - 34.4] | 26.1 [20.9 - 34.6] | 28.5 [25.3 - 36.1] | 32.4 [30.2 - 39]   | 37 [35.1 - 42.8]   | 41.7 [40.1 - 47.2] | 46.6 [45.1 - 51.8] | 51.5 [50.1 - 56.6] |
| 36 58 | 23.2 [17.3 - 31.2] | 24.3 [20.5 - 31.8] | 27.6 [25.2 - 34]   | 31.9 [30.1 - 37.5] | 36.6 [35.1 - 41.7] | 41.5 [40.1 - 46.3] | 46.4 [45.1 - 51]   | 51.4 [50.1 - 55.9] |

|       |                    |                    |                    |                    |                    |                    |                    |                    |
|-------|--------------------|--------------------|--------------------|--------------------|--------------------|--------------------|--------------------|--------------------|
| 36 60 | 21.1 [15.7 - 28.3] | 23.1 [20.3 - 29.5] | 27 [25.2 - 32.3]   | 31.6 [30.1 - 36.3] | 36.4 [35.1 - 40.8] | 41.3 [40.1 - 45.5] | 46.3 [45.1 - 50.4] | 51.2 [50.1 - 55.4] |
| 36 62 | 19.1 [14.2 - 25.7] | 22.2 [20.2 - 27.7] | 26.6 [25.1 - 31.1] | 31.3 [30.1 - 35.4] | 36.2 [35.1 - 40.1] | 41.2 [40.1 - 45]   | 46.1 [45.1 - 49.9] | 51.1 [50.1 - 54.9] |

**Table 2B: SCA1: Expected age at onset (mean (SD)) from birth and for different current age according to the genotype**

| CAG Repeat | At birth   |            |            |            | Current Age |            |            |            |  |
|------------|------------|------------|------------|------------|-------------|------------|------------|------------|--|
|            | 20         | 25         | 30         | 35         | 40          | 45         | 50         |            |  |
| 26 40      | 49.7 (8.9) | 49.7 (8.9) | 49.7 (8.9) | 49.7 (8.8) | 50.2 (8.5)  | 51.6 (7.8) | 54.1 (7)   | 57.5 (6.3) |  |
| 26 42      | 45.1 (8)   | 45.1 (8)   | 45.1 (8)   | 45.3 (7.8) | 46.3 (7.3)  | 48.6 (6.5) | 51.8 (5.7) | 55.8 (5.1) |  |
| 26 44      | 40.9 (7.3) | 40.9 (7.3) | 40.9 (7.2) | 41.5 (6.8) | 43.4 (6.1)  | 46.4 (5.3) | 50.3 (4.7) | 54.6 (4.2) |  |
| 26 46      | 37.1 (6.6) | 37.1 (6.6) | 37.3 (6.4) | 38.5 (5.8) | 41.2 (5)    | 44.9 (4.3) | 49.2 (3.9) | 53.8 (3.6) |  |
| 26 48      | 33.6 (6)   | 33.7 (5.9) | 34.2 (5.6) | 36.3 (4.8) | 39.8 (4.1)  | 43.9 (3.6) | 48.4 (3.3) | 53.2 (3)   |  |
| 26 50      | 30.5 (5.4) | 30.6 (5.3) | 31.8 (4.7) | 34.8 (3.9) | 38.7 (3.4)  | 43.2 (3)   | 47.9 (2.8) | 52.7 (2.6) |  |
| 26 52      | 27.7 (4.9) | 28.1 (4.7) | 30.1 (3.9) | 33.7 (3.2) | 38 (2.8)    | 42.7 (2.6) | 47.5 (2.4) | 52.4 (2.3) |  |
| 26 54      | 25.1 (4.5) | 26 (4)     | 28.8 (3.2) | 32.9 (2.7) | 37.5 (2.4)  | 42.3 (2.2) | 47.1 (2.1) | 52.1 (2.1) |  |
| 26 56      | 22.8 (4.1) | 24.4 (3.3) | 28 (2.6)   | 32.4 (2.2) | 37.1 (2)    | 42 (1.9)   | 46.9 (1.9) | 51.9 (1.9) |  |
| 26 58      | 20.7 (3.7) | 23.3 (2.7) | 27.4 (2.2) | 32 (1.9)   | 36.8 (1.8)  | 41.7 (1.7) | 46.7 (1.7) | 51.7 (1.7) |  |
| 26 60      | 18.7 (3.4) | 22.6 (2.2) | 26.9 (1.8) | 31.7 (1.7) | 36.6 (1.6)  | 41.6 (1.5) | 46.5 (1.5) | 51.5 (1.5) |  |
| 26 62      | 17 (3.1)   | 22 (1.9)   | 26.6 (1.6) | 31.5 (1.5) | 36.4 (1.4)  | 41.4 (1.4) | 46.4 (1.4) | 51.4 (1.4) |  |
| 28 40      | 51 (9)     | 51 (9)     | 51 (9)     | 51 (9)     | 51.4 (8.8)  | 52.5 (8.1) | 54.8 (7.3) | 58 (6.6)   |  |
| 28 42      | 46.3 (8.2) | 46.3 (8.2) | 46.3 (8.2) | 46.4 (8.1) | 47.3 (7.6)  | 49.3 (6.8) | 52.3 (6)   | 56.1 (5.4) |  |
| 28 44      | 42 (7.4)   | 42 (7.4)   | 42 (7.4)   | 42.5 (7.1) | 44 (6.3)    | 46.9 (5.5) | 50.6 (4.9) | 54.8 (4.4) |  |
| 28 46      | 38.1 (6.7) | 38.1 (6.7) | 38.2 (6.6) | 39.3 (6)   | 41.7 (5.2)  | 45.3 (4.5) | 49.4 (4)   | 53.9 (3.7) |  |
| 28 48      | 34.5 (6.1) | 34.6 (6.1) | 35 (5.8)   | 36.8 (5)   | 40.1 (4.3)  | 44.1 (3.7) | 48.6 (3.4) | 53.3 (3.1) |  |
| 28 50      | 31.3 (5.5) | 31.4 (5.5) | 32.4 (4.9) | 35.1 (4.1) | 38.9 (3.5)  | 43.3 (3.1) | 48 (2.9)   | 52.8 (2.7) |  |
| 28 52      | 28.4 (5)   | 28.7 (4.8) | 30.5 (4.1) | 33.9 (3.4) | 38.1 (2.9)  | 42.8 (2.6) | 47.5 (2.5) | 52.4 (2.4) |  |
| 28 54      | 25.8 (4.6) | 26.5 (4.1) | 29.1 (3.3) | 33.1 (2.8) | 37.6 (2.5)  | 42.3 (2.3) | 47.2 (2.2) | 52.1 (2.1) |  |
| 28 56      | 23.4 (4.2) | 24.8 (3.5) | 28.2 (2.7) | 32.5 (2.3) | 37.2 (2.1)  | 42 (2)     | 46.9 (1.9) | 51.9 (1.9) |  |
| 28 58      | 21.2 (3.8) | 23.6 (2.8) | 27.5 (2.3) | 32.1 (2)   | 36.9 (1.8)  | 41.8 (1.8) | 46.7 (1.7) | 51.7 (1.7) |  |
| 28 60      | 19.2 (3.4) | 22.7 (2.3) | 27 (1.9)   | 31.8 (1.7) | 36.6 (1.6)  | 41.6 (1.6) | 46.6 (1.6) | 51.6 (1.6) |  |
| 28 62      | 17.5 (3.1) | 22.2 (1.9) | 26.7 (1.6) | 31.5 (1.5) | 36.5 (1.4)  | 41.4 (1.4) | 46.4 (1.4) | 51.4 (1.4) |  |
| 30 40      | 52.4 (9.3) | 52.4 (9.3) | 52.4 (9.3) | 52.4 (9.2) | 52.6 (9)    | 53.6 (8.5) | 55.6 (7.7) | 58.6 (6.9) |  |
| 30 42      | 47.5 (8.4) | 47.5 (8.4) | 47.5 (8.4) | 47.6 (8.3) | 48.3 (7.9)  | 50 (7.1)   | 52.9 (6.3) | 56.5 (5.6) |  |
| 30 44      | 43.1 (7.6) | 43.1 (7.6) | 43.1 (7.6) | 43.5 (7.3) | 44.8 (6.6)  | 47.4 (5.8) | 51 (5.1)   | 55.1 (4.6) |  |
| 30 46      | 39.1 (6.9) | 39.1 (6.9) | 39.2 (6.8) | 40 (6.3)   | 42.3 (5.5)  | 45.6 (4.8) | 49.7 (4.2) | 54.1 (3.9) |  |
| 30 48      | 35.5 (6.3) | 35.5 (6.2) | 35.8 (6)   | 37.4 (5.3) | 40.4 (4.5)  | 44.4 (3.9) | 48.8 (3.5) | 53.4 (3.3) |  |

|       |             |             |             |             |             |            |            |            |
|-------|-------------|-------------|-------------|-------------|-------------|------------|------------|------------|
| 30 50 | 32.2 (5.7)  | 32.2 (5.6)  | 33 (5.1)    | 35.5 (4.3)  | 39.2 (3.7)  | 43.5 (3.3) | 48.1 (3)   | 52.9 (2.8) |
| 30 52 | 29.2 (5.2)  | 29.4 (5)    | 30.9 (4.3)  | 34.2 (3.5)  | 38.3 (3)    | 42.9 (2.7) | 47.6 (2.6) | 52.5 (2.5) |
| 30 54 | 26.5 (4.7)  | 27 (4.3)    | 29.4 (3.5)  | 33.3 (2.9)  | 37.7 (2.6)  | 42.4 (2.4) | 47.3 (2.2) | 52.2 (2.2) |
| 30 56 | 24 (4.3)    | 25.2 (3.6)  | 28.4 (2.9)  | 32.6 (2.4)  | 37.3 (2.2)  | 42.1 (2.1) | 47 (2)     | 52 (1.9)   |
| 30 58 | 21.8 (3.9)  | 23.9 (3)    | 27.6 (2.4)  | 32.2 (2.1)  | 36.9 (1.9)  | 41.8 (1.8) | 46.8 (1.8) | 51.8 (1.8) |
| 30 60 | 19.8 (3.5)  | 22.9 (2.5)  | 27.1 (2)    | 31.8 (1.8)  | 36.7 (1.7)  | 41.6 (1.6) | 46.6 (1.6) | 51.6 (1.6) |
| 30 62 | 17.9 (3.2)  | 22.3 (2)    | 26.8 (1.7)  | 31.6 (1.6)  | 36.5 (1.5)  | 41.5 (1.5) | 46.5 (1.5) | 51.5 (1.5) |
| 32 40 | 53.8 (9.5)  | 53.8 (9.5)  | 53.8 (9.5)  | 53.8 (9.5)  | 54 (9.4)    | 54.8 (8.9) | 56.5 (8.1) | 59.3 (7.3) |
| 32 42 | 48.8 (8.6)  | 48.8 (8.6)  | 48.8 (8.6)  | 48.9 (8.6)  | 49.4 (8.2)  | 50.9 (7.5) | 53.5 (6.7) | 57 (6)     |
| 32 44 | 44.3 (7.8)  | 44.3 (7.8)  | 44.3 (7.8)  | 44.5 (7.6)  | 45.7 (7)    | 48.1 (6.2) | 51.5 (5.4) | 55.5 (4.9) |
| 32 46 | 40.1 (7.1)  | 40.1 (7.1)  | 40.2 (7)    | 40.9 (6.6)  | 42.9 (5.8)  | 46.1 (5)   | 50 (4.5)   | 54.4 (4.1) |
| 32 48 | 36.4 (6.4)  | 36.4 (6.4)  | 36.7 (6.2)  | 38 (5.6)    | 40.9 (4.8)  | 44.7 (4.1) | 49 (3.7)   | 53.6 (3.4) |
| 32 50 | 33 (5.8)    | 33.1 (5.8)  | 33.7 (5.4)  | 36 (4.6)    | 39.5 (3.9)  | 43.7 (3.4) | 48.3 (3.1) | 53 (2.9)   |
| 32 52 | 30 (5.3)    | 30.1 (5.2)  | 31.5 (4.5)  | 34.5 (3.8)  | 38.5 (3.2)  | 43 (2.9)   | 47.8 (2.7) | 52.6 (2.6) |
| 32 54 | 27.2 (4.8)  | 27.6 (4.5)  | 29.8 (3.7)  | 33.5 (3.1)  | 37.9 (2.7)  | 42.6 (2.5) | 47.4 (2.3) | 52.3 (2.3) |
| 32 56 | 24.7 (4.4)  | 25.6 (3.8)  | 28.6 (3.1)  | 32.8 (2.6)  | 37.4 (2.3)  | 42.2 (2.1) | 47.1 (2.1) | 52 (2)     |
| 32 58 | 22.4 (4)    | 24.2 (3.2)  | 27.8 (2.5)  | 32.3 (2.2)  | 37 (2)      | 41.9 (1.9) | 46.8 (1.8) | 51.8 (1.8) |
| 32 60 | 20.3 (3.6)  | 23.2 (2.6)  | 27.3 (2.1)  | 31.9 (1.9)  | 36.8 (1.7)  | 41.7 (1.7) | 46.7 (1.7) | 51.7 (1.7) |
| 32 62 | 18.4 (3.3)  | 22.4 (2.1)  | 26.9 (1.8)  | 31.7 (1.6)  | 36.6 (1.5)  | 41.5 (1.5) | 46.5 (1.5) | 51.5 (1.5) |
| 34 40 | 55.2 (9.8)  | 55.2 (9.8)  | 55.2 (9.8)  | 55.2 (9.8)  | 55.4 (9.7)  | 56 (9.3)   | 57.6 (8.6) | 60.1 (7.8) |
| 34 42 | 50.1 (8.9)  | 50.1 (8.9)  | 50.1 (8.9)  | 50.2 (8.9)  | 50.6 (8.6)  | 51.9 (7.9) | 54.3 (7.1) | 57.6 (6.3) |
| 34 44 | 45.4 (8.1)  | 45.4 (8.1)  | 45.5 (8.1)  | 45.7 (7.9)  | 46.6 (7.4)  | 48.8 (6.5) | 52 (5.8)   | 55.9 (5.2) |
| 34 46 | 41.2 (7.3)  | 41.2 (7.3)  | 41.3 (7.3)  | 41.8 (6.9)  | 43.6 (6.2)  | 46.6 (5.4) | 50.4 (4.7) | 54.7 (4.3) |
| 34 48 | 37.4 (6.6)  | 37.4 (6.6)  | 37.6 (6.5)  | 38.8 (5.9)  | 41.4 (5.1)  | 45 (4.4)   | 49.3 (3.9) | 53.8 (3.6) |
| 34 50 | 33.9 (6)    | 34 (6)      | 34.5 (5.6)  | 36.5 (4.9)  | 39.9 (4.1)  | 44 (3.6)   | 48.5 (3.3) | 53.2 (3.1) |
| 34 52 | 30.8 (5.5)  | 30.9 (5.4)  | 32 (4.8)    | 34.9 (4)    | 38.8 (3.4)  | 43.2 (3)   | 47.9 (2.8) | 52.7 (2.7) |
| 34 54 | 27.9 (5)    | 28.3 (4.7)  | 30.2 (4)    | 33.8 (3.3)  | 38.1 (2.8)  | 42.7 (2.6) | 47.5 (2.4) | 52.4 (2.4) |
| 34 56 | 25.3 (4.5)  | 26.2 (4)    | 28.9 (3.3)  | 33 (2.7)    | 37.5 (2.4)  | 42.3 (2.2) | 47.2 (2.1) | 52.1 (2.1) |
| 34 58 | 23 (4.1)    | 24.6 (3.4)  | 28 (2.7)    | 32.4 (2.3)  | 37.1 (2.1)  | 42 (2)     | 46.9 (1.9) | 51.9 (1.9) |
| 34 60 | 20.8 (3.7)  | 23.4 (2.8)  | 27.4 (2.2)  | 32 (2)      | 36.9 (1.8)  | 41.8 (1.8) | 46.7 (1.7) | 51.7 (1.7) |
| 34 62 | 18.9 (3.4)  | 22.6 (2.3)  | 27 (1.9)    | 31.7 (1.7)  | 36.6 (1.6)  | 41.6 (1.6) | 46.6 (1.6) | 51.6 (1.6) |
| 36 40 | 56.7 (10.2) | 56.7 (10.2) | 56.7 (10.2) | 56.7 (10.2) | 56.8 (10.1) | 57.3 (9.7) | 58.7 (9.1) | 61 (8.3)   |
| 36 42 | 51.5 (9.2)  | 51.5 (9.2)  | 51.5 (9.2)  | 51.5 (9.2)  | 51.8 (8.9)  | 52.9 (8.3) | 55.1 (7.5) | 58.3 (6.8) |
| 36 44 | 46.7 (8.4)  | 46.7 (8.4)  | 46.7 (8.4)  | 46.8 (8.2)  | 47.6 (7.7)  | 49.6 (7)   | 52.6 (6.2) | 56.4 (5.5) |
| 36 46 | 42.3 (7.6)  | 42.3 (7.6)  | 42.4 (7.6)  | 42.8 (7.2)  | 44.4 (6.5)  | 47.2 (5.7) | 50.8 (5.1) | 55 (4.6)   |
| 36 48 | 38.4 (6.9)  | 38.4 (6.9)  | 38.6 (6.8)  | 39.6 (6.2)  | 42 (5.4)    | 45.5 (4.7) | 49.6 (4.2) | 54.1 (3.8) |
| 36 50 | 34.8 (6.3)  | 34.9 (6.2)  | 35.3 (5.9)  | 37.1 (5.2)  | 40.3 (4.4)  | 44.3 (3.9) | 48.7 (3.5) | 53.4 (3.3) |

|       |            |            |            |            |            |            |            |            |
|-------|------------|------------|------------|------------|------------|------------|------------|------------|
| 36 52 | 31.6 (5.7) | 31.7 (5.6) | 32.7 (5.1) | 35.3 (4.3) | 39.1 (3.6) | 43.5 (3.2) | 48.1 (3)   | 52.9 (2.8) |
| 36 54 | 28.7 (5.2) | 28.9 (5)   | 30.7 (4.2) | 34.1 (3.5) | 38.3 (3)   | 42.9 (2.7) | 47.7 (2.6) | 52.5 (2.5) |
| 36 56 | 26 (4.7)   | 26.7 (4.3) | 29.3 (3.5) | 33.2 (2.9) | 37.7 (2.6) | 42.4 (2.4) | 47.3 (2.3) | 52.2 (2.2) |
| 36 58 | 23.6 (4.3) | 25 (3.6)   | 28.3 (2.9) | 32.6 (2.4) | 37.3 (2.2) | 42.1 (2.1) | 47 (2)     | 52 (2)     |
| 36 60 | 21.4 (3.9) | 23.7 (3)   | 27.6 (2.4) | 32.2 (2.1) | 37 (1.9)   | 41.9 (1.8) | 46.8 (1.8) | 51.8 (1.8) |
| 36 62 | 19.4 (3.5) | 22.9 (2.4) | 27.1 (2)   | 31.8 (1.8) | 36.7 (1.7) | 41.7 (1.7) | 46.6 (1.6) | 51.6 (1.6) |

---

**Table 3: SCA2: Expected age at onset from birth and for different current age according to the genotype**

| CAG Repeat |                 | Current Age        |                    |                    |                    |                    |                    |                    |                    |
|------------|-----------------|--------------------|--------------------|--------------------|--------------------|--------------------|--------------------|--------------------|--------------------|
|            |                 | At birth           | 20                 | 25                 | 30                 | 35                 | 40                 | 45                 | 50                 |
| 35         | Mean (SD)       | 53.8 (13.8)        | 53.8 (13.8)        | 53.8 (13.8)        | 54.2 (13.6)        | 55.2 (13)          | 57 (12.3)          | 59.7 (11.6)        | 63 (10.9)          |
| 35         | Median [90% CR] | 52.1 [34.3 - 79]   | 52.1 [34.4 - 79]   | 52.1 [34.5 - 79]   | 52.3 [35.4 - 79.1] | 53.1 [37.9 - 79.6] | 54.6 [41.7 - 80.5] | 57.1 [46.2 - 82.1] | 60.3 [50.9 - 84.4] |
| 36         | Mean (SD)       | 48.4 (12.4)        | 48.4 (12.4)        | 48.6 (12.3)        | 49.3 (11.9)        | 50.9 (11.3)        | 53.4 (10.5)        | 56.7 (9.8)         | 60.5 (9.3)         |
| 36         | Median [90% CR] | 46.9 [30.9 - 71.1] | 46.9 [31 - 71.1]   | 47 [31.4 - 71.1]   | 47.5 [33.2 - 71.4] | 48.8 [36.7 - 72.2] | 51.1 [41.1 - 73.7] | 54.2 [45.8 - 75.9] | 58 [50.7 - 78.8]   |
| 37         | Mean (SD)       | 43.6 (11.2)        | 43.6 (11.1)        | 44 (10.9)          | 45.2 (10.3)        | 47.5 (9.6)         | 50.7 (8.9)         | 54.4 (8.3)         | 58.6 (7.9)         |
| 37         | Median [90% CR] | 42.2 [27.9 - 64]   | 42.2 [28 - 64]     | 42.5 [29 - 64.1]   | 43.4 [31.9 - 64.7] | 45.4 [36.1 - 66]   | 48.5 [40.8 - 68.1] | 52.2 [45.6 - 70.9] | 56.4 [50.5 - 74.3] |
| 38         | Mean (SD)       | 39.2 (10.1)        | 39.3 (10)          | 40.1 (9.6)         | 42 (8.9)           | 44.9 (8.1)         | 48.6 (7.6)         | 52.8 (7.1)         | 57.2 (6.8)         |
| 38         | Median [90% CR] | 38 [25.1 - 57.6]   | 38.1 [25.4 - 57.6] | 38.6 [27.3 - 57.9] | 40.2 [31.2 - 58.9] | 42.9 [35.7 - 60.8] | 46.6 [40.5 - 63.5] | 50.8 [45.5 - 66.9] | 55.2 [50.4 - 70.7] |
| 39         | Mean (SD)       | 35.3 (9.1)         | 35.6 (8.9)         | 36.9 (8.3)         | 39.4 (7.5)         | 43 (6.9)           | 47.1 (6.4)         | 51.5 (6.1)         | 56.1 (5.9)         |
| 39         | Median [90% CR] | 34.2 [22.6 - 51.8] | 34.4 [23.4 - 51.9] | 35.4 [26.4 - 52.5] | 37.7 [30.8 - 54.1] | 41.2 [35.5 - 56.6] | 45.3 [40.4 - 59.8] | 49.7 [45.4 - 63.7] | 54.4 [50.3 - 67.9] |
| 40         | Mean (SD)       | 31.8 (8.2)         | 32.4 (7.8)         | 34.4 (7.1)         | 37.5 (6.4)         | 41.5 (5.9)         | 45.9 (5.5)         | 50.5 (5.3)         | 55.3 (5.2)         |
| 40         | Median [90% CR] | 30.8 [20.3 - 46.7] | 31.2 [22 - 46.9]   | 32.9 [25.9 - 47.9] | 35.9 [30.5 - 50.1] | 39.9 [35.4 - 53.2] | 44.3 [40.3 - 56.9] | 48.9 [45.3 - 61.1] | 53.7 [50.3 - 65.6] |
| 41         | Mean (SD)       | 28.6 (7.3)         | 29.8 (6.7)         | 32.4 (6)           | 36.1 (5.4)         | 40.4 (5)           | 45 (4.8)           | 49.8 (4.7)         | 54.6 (4.6)         |
| 41         | Median [90% CR] | 27.7 [18.3 - 42]   | 28.6 [21.2 - 42.5] | 31 [25.6 - 44.1]   | 34.6 [30.4 - 46.9] | 39 [35.3 - 50.4]   | 43.6 [40.3 - 54.6] | 48.4 [45.3 - 59]   | 53.2 [50.2 - 63.7] |
| 42         | Mean (SD)       | 25.8 (6.6)         | 27.7 (5.8)         | 30.9 (5.1)         | 35 (4.6)           | 39.6 (4.4)         | 44.3 (4.2)         | 49.2 (4.1)         | 54.1 (4.1)         |
| 42         | Median [90% CR] | 25 [16.5 - 37.8]   | 26.5 [20.7 - 38.8] | 29.6 [25.4 - 41]   | 33.7 [30.3 - 44.3] | 38.3 [35.3 - 48.3] | 43.1 [40.2 - 52.7] | 47.9 [45.2 - 57.4] | 52.9 [50.2 - 62.3] |
| 43         | Mean (SD)       | 23.2 (6)           | 26.1 (4.9)         | 29.8 (4.4)         | 34.2 (4)           | 38.9 (3.8)         | 43.8 (3.7)         | 48.7 (3.7)         | 53.7 (3.7)         |
| 43         | Median [90% CR] | 22.5 [14.8 - 34.1] | 25 [20.5 - 35.7]   | 28.7 [25.3 - 38.5] | 33.1 [30.2 - 42.2] | 37.8 [35.2 - 46.6] | 42.6 [40.2 - 51.2] | 47.6 [45.2 - 56.1] | 52.6 [50.2 - 61]   |
| 44         | Mean (SD)       | 20.9 (5.4)         | 24.9 (4.2)         | 29 (3.7)           | 33.6 (3.5)         | 38.4 (3.4)         | 43.3 (3.3)         | 48.3 (3.3)         | 53.3 (3.4)         |
| 44         | Median [90% CR] | 20.2 [13.3 - 30.7] | 23.8 [20.3 - 33.1] | 28 [25.2 - 36.4]   | 32.6 [30.2 - 40.6] | 37.4 [35.2 - 45.2] | 42.3 [40.2 - 50]   | 47.3 [45.2 - 55]   | 52.3 [50.2 - 60]   |
| 45         | Mean (SD)       | 18.8 (4.9)         | 24 (3.6)           | 28.4 (3.2)         | 33.1 (3.1)         | 38 (3)             | 43 (3)             | 48 (3)             | 53 (3.1)           |
| 45         | Median [90% CR] | 18.2 [12 - 27.7]   | 23 [20.2 - 31]     | 27.5 [25.2 - 34.8] | 32.2 [30.2 - 39.3] | 37.1 [35.2 - 44]   | 42.1 [40.2 - 49]   | 47.1 [45.2 - 54]   | 52.1 [50.2 - 59.2] |
| 46         | Mean (SD)       | 16.9 (4.4)         | 23.3 (3.1)         | 27.9 (2.8)         | 32.8 (2.7)         | 37.7 (2.7)         | 42.7 (2.7)         | 47.8 (2.8)         | 52.8 (2.8)         |
| 46         | Median [90% CR] | 16.4 [10.8 - 24.9] | 22.4 [20.2 - 29.4] | 27.1 [25.2 - 33.6] | 31.9 [30.1 - 38.2] | 36.9 [35.1 - 43.1] | 41.9 [40.1 - 48.2] | 46.9 [45.1 - 53.3] | 51.9 [50.1 - 58.4] |
| 47         | Mean (SD)       | 15.2 (4)           | 22.8 (2.7)         | 27.5 (2.5)         | 32.5 (2.5)         | 37.5 (2.5)         | 42.5 (2.5)         | 47.5 (2.6)         | 52.6 (2.6)         |
| 47         | Median [90% CR] | 14.8 [9.7 - 22.5]  | 22 [20.2 - 28.1]   | 26.8 [25.1 - 32.5] | 31.7 [30.1 - 37.4] | 36.7 [35.1 - 42.4] | 41.7 [40.1 - 47.5] | 46.7 [45.1 - 52.6] | 51.8 [50.1 - 57.8] |
| 48         | Mean (SD)       | 13.7 (3.6)         | 22.4 (2.3)         | 27.3 (2.2)         | 32.2 (2.2)         | 37.2 (2.3)         | 42.3 (2.3)         | 47.3 (2.4)         | 52.4 (2.5)         |
| 48         | Median [90% CR] | 13.3 [8.7 - 20.2]  | 21.7 [20.1 - 27]   | 26.6 [25.1 - 31.7] | 31.5 [30.1 - 36.7] | 36.5 [35.1 - 41.7] | 41.6 [40.1 - 46.9] | 46.6 [45.1 - 52.1] | 51.7 [50.1 - 57.3] |
| 49         | Mean (SD)       | 12.4 (3.2)         | 22.1 (2.1)         | 27 (2)             | 32 (2)             | 37.1 (2.1)         | 42.1 (2.1)         | 47.2 (2.2)         | 52.3 (2.3)         |
| 49         | Median [90% CR] | 12 [7.8 - 18.2]    | 21.5 [20.1 - 26.2] | 26.4 [25.1 - 31]   | 31.4 [30.1 - 36.1] | 36.4 [35.1 - 41.2] | 41.5 [40.1 - 46.4] | 46.5 [45.1 - 51.6] | 51.6 [50.1 - 56.8] |
| 50         | Mean (SD)       | 11.1 (2.9)         | 21.8 (1.8)         | 26.8 (1.8)         | 31.9 (1.9)         | 36.9 (1.9)         | 42 (2)             | 47.1 (2.1)         | 52.1 (2.2)         |
| 50         | Median [90% CR] | 10.8 [7.1 - 16.4]  | 21.3 [20.1 - 25.5] | 26.3 [25.1 - 30.5] | 31.3 [30.1 - 35.6] | 36.3 [35.1 - 40.7] | 41.4 [40.1 - 46]   | 46.4 [45.1 - 51.2] | 51.5 [50.1 - 56.4] |

**Table 4: SCA3: Expected age at onset from birth and for different current age according to the genotype**

| CAG Rep |                 | Current Age         |                     |                     |                     |                     |                     |                     |                     |  |
|---------|-----------------|---------------------|---------------------|---------------------|---------------------|---------------------|---------------------|---------------------|---------------------|--|
|         |                 | At birth            | 20                  | 25                  | 30                  | 35                  | 40                  | 45                  | 50                  |  |
| 54      | Mean (SD)       | 87.2 (19.5)         | 87.2 (19.5)         | 87.2 (19.5)         | 87.2 (19.5)         | 87.2 (19.5)         | 87.3 (19.4)         | 87.3 (19.4)         | 87.6 (19.2)         |  |
| 54      | Median [90% CR] | 85.1 [59.3 - 122.3] | 85.1 [59.3 - 122.3] | 85.1 [59.3 - 122.3] | 85.1 [59.3 - 122.3] | 85.1 [59.3 - 122.3] | 85.2 [59.3 - 122.3] | 85.2 [59.5 - 122.4] | 85.3 [60.2 - 122.4] |  |
| 55      | Mean (SD)       | 82.4 (18.3)         | 82.4 (18.3)         | 82.4 (18.3)         | 82.4 (18.3)         | 82.4 (18.3)         | 82.5 (18.3)         | 82.6 (18.2)         | 83 (17.9)           |  |
| 55      | Median [90% CR] | 80.5 [56.1 - 115.5] | 80.5 [56.1 - 115.5] | 80.5 [56.1 - 115.5] | 80.5 [56.1 - 115.5] | 80.5 [56.1 - 115.5] | 80.5 [56.1 - 115.5] | 80.6 [56.5 - 115.6] | 80.8 [57.6 - 115.7] |  |
| 56      | Mean (SD)       | 77.9 (17.3)         | 77.9 (17.3)         | 77.9 (17.3)         | 77.9 (17.3)         | 77.9 (17.3)         | 78 (17.2)           | 78.2 (17.1)         | 78.8 (16.7)         |  |
| 56      | Median [90% CR] | 76.1 [53 - 109.1]   | 76.1 [53 - 109.1]   | 76.1 [53 - 109.1]   | 76.1 [53 - 109.1]   | 76.1 [53 - 109.1]   | 76.1 [53.2 - 109.1] | 76.2 [53.9 - 109.2] | 76.6 [55.6 - 109.5] |  |
| 57      | Mean (SD)       | 73.6 (16.3)         | 73.6 (16.3)         | 73.6 (16.3)         | 73.6 (16.3)         | 73.7 (16.3)         | 73.8 (16.2)         | 74.2 (15.9)         | 75.1 (15.4)         |  |
| 57      | Median [90% CR] | 71.9 [50.1 - 103.1] | 71.9 [50.1 - 103.1] | 71.9 [50.1 - 103.1] | 71.9 [50.1 - 103.1] | 71.9 [50.2 - 103.1] | 72 [50.5 - 103.1]   | 72.2 [51.6 - 103.2] | 72.9 [54 - 103.6]   |  |
| 58      | Mean (SD)       | 69.6 (15.4)         | 69.6 (15.4)         | 69.6 (15.4)         | 69.6 (15.4)         | 69.6 (15.4)         | 69.8 (15.2)         | 70.5 (14.8)         | 71.7 (14.2)         |  |
| 58      | Median [90% CR] | 67.9 [47.4 - 97.4]  | 67.9 [47.4 - 97.4]  | 67.9 [47.4 - 97.4]  | 67.9 [47.4 - 97.4]  | 68 [47.5 - 97.4]    | 68.1 [48.1 - 97.4]  | 68.5 [49.8 - 97.7]  | 69.5 [52.9 - 98.2]  |  |
| 59      | Mean (SD)       | 65.8 (14.5)         | 65.8 (14.5)         | 65.8 (14.5)         | 65.8 (14.5)         | 65.9 (14.5)         | 66.2 (14.2)         | 67.1 (13.7)         | 68.8 (13)           |  |
| 59      | Median [90% CR] | 64.2 [44.8 - 92]    | 64.2 [44.8 - 92]    | 64.2 [44.8 - 92]    | 64.2 [44.9 - 92]    | 64.3 [45.1 - 92]    | 64.5 [46.1 - 92.1]  | 65.1 [48.5 - 92.5]  | 66.5 [52.1 - 93.3]  |  |
| 60      | Mean (SD)       | 62.2 (13.7)         | 62.2 (13.7)         | 62.2 (13.7)         | 62.2 (13.7)         | 62.3 (13.6)         | 62.9 (13.2)         | 64.1 (12.6)         | 66.2 (11.8)         |  |
| 60      | Median [90% CR] | 60.7 [42.4 - 86.9]  | 60.7 [42.4 - 86.9]  | 60.7 [42.4 - 86.9]  | 60.7 [42.5 - 86.9]  | 60.8 [42.9 - 86.9]  | 61.2 [44.4 - 87.1]  | 62.1 [47.5 - 87.7]  | 63.9 [51.6 - 88.8]  |  |
| 61      | Mean (SD)       | 58.7 (12.9)         | 58.7 (12.9)         | 58.7 (12.9)         | 58.8 (12.9)         | 59.1 (12.7)         | 59.9 (12.2)         | 61.5 (11.5)         | 64 (10.7)           |  |
| 61      | Median [90% CR] | 57.4 [40.1 - 82.1]  | 57.4 [40.1 - 82.1]  | 57.4 [40.1 - 82.1]  | 57.4 [40.2 - 82.1]  | 57.5 [41 - 82.2]    | 58.1 [43.2 - 82.5]  | 59.5 [46.8 - 83.3]  | 61.7 [51.2 - 84.7]  |  |
| 62      | Mean (SD)       | 55.5 (12.2)         | 55.5 (12.2)         | 55.5 (12.2)         | 55.6 (12.1)         | 56 (11.8)           | 57.2 (11.3)         | 59.3 (10.5)         | 62.2 (9.7)          |  |
| 62      | Median [90% CR] | 54.2 [37.9 - 77.6]  | 54.2 [37.9 - 77.6]  | 54.2 [37.9 - 77.6]  | 54.3 [38.2 - 77.6]  | 54.5 [39.4 - 77.7]  | 55.4 [42.3 - 78.2]  | 57.2 [46.4 - 79.3]  | 59.9 [50.9 - 81.1]  |  |
| 63      | Mean (SD)       | 52.5 (11.5)         | 52.5 (11.5)         | 52.5 (11.5)         | 52.6 (11.4)         | 53.3 (11)           | 54.9 (10.3)         | 57.4 (9.5)          | 60.6 (8.8)          |  |
| 63      | Median [90% CR] | 51.2 [35.8 - 73.3]  | 51.2 [35.8 - 73.3]  | 51.3 [35.9 - 73.3]  | 51.3 [36.3 - 73.3]  | 51.8 [38.2 - 73.6]  | 53.1 [41.7 - 74.3]  | 55.3 [46 - 75.7]    | 58.5 [50.8 - 77.8]  |  |
| 64      | Mean (SD)       | 49.6 (10.9)         | 49.6 (10.9)         | 49.6 (10.9)         | 49.9 (10.7)         | 50.9 (10.1)         | 52.8 (9.4)          | 55.7 (8.6)          | 59.3 (8)            |  |
| 64      | Median [90% CR] | 48.4 [33.9 - 69.2]  | 48.4 [33.9 - 69.2]  | 48.5 [34 - 69.2]    | 48.6 [34.7 - 69.3]  | 49.3 [37.3 - 69.7]  | 51 [41.2 - 70.8]    | 53.7 [45.8 - 72.5]  | 57.2 [50.6 - 75]    |  |
| 65      | Mean (SD)       | 46.9 (10.3)         | 46.9 (10.3)         | 46.9 (10.2)         | 47.4 (9.9)          | 48.7 (9.3)          | 51.1 (8.5)          | 54.4 (7.8)          | 58.2 (7.2)          |  |
| 65      | Median [90% CR] | 45.8 [32 - 65.4]    | 45.8 [32 - 65.4]    | 45.8 [32.2 - 65.4]  | 46.1 [33.5 - 65.6]  | 47.1 [36.6 - 66.2]  | 49.3 [40.9 - 67.5]  | 52.4 [45.7 - 69.7]  | 56.3 [50.5 - 72.5]  |  |
| 66      | Mean (SD)       | 44.3 (9.7)          | 44.3 (9.7)          | 44.4 (9.6)          | 45.1 (9.2)          | 46.8 (8.5)          | 49.6 (7.7)          | 53.2 (7.1)          | 57.3 (6.6)          |  |
| 66      | Median [90% CR] | 43.3 [30.3 - 61.8]  | 43.3 [30.3 - 61.8]  | 43.3 [30.6 - 61.9]  | 43.8 [32.5 - 62.1]  | 45.3 [36.2 - 63]    | 47.9 [40.7 - 64.7]  | 51.4 [45.5 - 67.2]  | 55.5 [50.4 - 70.3]  |  |
| 67      | Mean (SD)       | 41.9 (9.2)          | 41.9 (9.2)          | 42.1 (9)            | 43.1 (8.5)          | 45.2 (7.7)          | 48.4 (7)            | 52.3 (6.4)          | 56.5 (6)            |  |
| 67      | Median [90% CR] | 40.9 [28.6 - 58.4]  | 40.9 [28.6 - 58.4]  | 41 [29.2 - 58.5]    | 41.8 [31.8 - 58.9]  | 43.7 [35.9 - 60.1]  | 46.7 [40.6 - 62.1]  | 50.5 [45.5 - 65]    | 54.8 [50.4 - 68.4]  |  |
| 68      | Mean (SD)       | 39.6 (8.7)          | 39.6 (8.7)          | 39.9 (8.4)          | 41.3 (7.8)          | 43.9 (7)            | 47.4 (6.3)          | 51.4 (5.8)          | 55.9 (5.5)          |  |
| 68      | Median [90% CR] | 38.7 [27.1 - 55.2]  | 38.7 [27.1 - 55.2]  | 38.9 [28.1 - 55.4]  | 40 [31.3 - 56]      | 42.3 [35.7 - 57.5]  | 45.7 [40.5 - 59.9]  | 49.8 [45.4 - 63]    | 54.3 [50.3 - 66.8]  |  |
| 69      | Mean (SD)       | 37.4 (8.2)          | 37.5 (8.2)          | 38 (7.8)            | 39.8 (7.1)          | 42.7 (6.3)          | 46.5 (5.8)          | 50.8 (5.3)          | 55.3 (5)            |  |
| 69      | Median [90% CR] | 36.5 [25.6 - 52.2]  | 36.6 [25.7 - 52.2]  | 36.9 [27.2 - 52.4]  | 38.4 [31 - 53.3]    | 41.2 [35.6 - 55.1]  | 45 [40.4 - 57.9]    | 49.3 [45.3 - 61.4]  | 53.8 [50.3 - 65.3]  |  |
| 70      | Mean (SD)       | 35.3 (7.8)          | 35.4 (7.7)          | 36.3 (7.2)          | 38.4 (6.5)          | 41.8 (5.8)          | 45.8 (5.2)          | 50.2 (4.9)          | 54.8 (4.6)          |  |



|    |                 |                    |                    |                    |                    |                    |                    |                    |                    |
|----|-----------------|--------------------|--------------------|--------------------|--------------------|--------------------|--------------------|--------------------|--------------------|
| 70 | Median [90% CR] | 34.5 [24.2 - 49.3] | 34.6 [24.4 - 49.4] | 35.2 [26.6 - 49.7] | 37.1 [30.7 - 50.9] | 40.3 [35.5 - 53.1] | 44.3 [40.3 - 56.2] | 48.8 [45.3 - 59.9] | 53.5 [50.3 - 64.1] |
| 71 | Mean (SD)       | 33.4 (7.3)         | 33.6 (7.2)         | 34.7 (6.6)         | 37.3 (5.9)         | 41 (5.2)           | 45.2 (4.8)         | 49.7 (4.5)         | 54.4 (4.3)         |
| 71 | Median [90% CR] | 32.6 [22.8 - 46.6] | 32.7 [23.3 - 46.7] | 33.6 [26.2 - 47.2] | 36 [30.6 - 48.7]   | 39.6 [35.4 - 51.3] | 43.8 [40.3 - 54.7] | 48.4 [45.3 - 58.6] | 53.1 [50.2 - 63]   |
| 72 | Mean (SD)       | 31.6 (6.9)         | 31.9 (6.7)         | 33.4 (6.1)         | 36.4 (5.3)         | 40.3 (4.7)         | 44.7 (4.4)         | 49.3 (4.1)         | 54.1 (4)           |
| 72 | Median [90% CR] | 30.8 [21.6 - 44.1] | 31 [22.5 - 44.2]   | 32.3 [25.9 - 44.9] | 35.1 [30.5 - 46.8] | 39 [35.3 - 49.7]   | 43.4 [40.3 - 53.4] | 48.1 [45.2 - 57.5] | 52.9 [50.2 - 62]   |
| 73 | Mean (SD)       | 29.8 (6.6)         | 30.3 (6.2)         | 32.3 (5.5)         | 35.6 (4.8)         | 39.7 (4.3)         | 44.2 (4)           | 48.9 (3.8)         | 53.8 (3.7)         |
| 73 | Median [90% CR] | 29.2 [20.4 - 41.7] | 29.5 [21.8 - 41.9] | 31.2 [25.6 - 42.9] | 34.4 [30.4 - 45.1] | 38.5 [35.3 - 48.3] | 43.1 [40.2 - 52.2] | 47.8 [45.2 - 56.6] | 52.7 [50.2 - 61.2] |
| 74 | Mean (SD)       | 28.2 (6.2)         | 29 (5.8)           | 31.3 (5)           | 35 (4.4)           | 39.3 (4)           | 43.9 (3.7)         | 48.6 (3.5)         | 53.5 (3.5)         |
| 74 | Median [90% CR] | 27.6 [19.3 - 39.4] | 28.1 [21.3 - 39.7] | 30.2 [25.5 - 41]   | 33.8 [30.3 - 43.6] | 38.1 [35.2 - 47.1] | 42.8 [40.2 - 51.2] | 47.6 [45.2 - 55.7] | 52.5 [50.2 - 60.4] |
| 75 | Mean (SD)       | 26.7 (5.9)         | 27.8 (5.3)         | 30.5 (4.5)         | 34.4 (4)           | 38.8 (3.6)         | 43.5 (3.4)         | 48.4 (3.3)         | 53.3 (3.2)         |
| 75 | Median [90% CR] | 26 [18.2 - 37.3]   | 26.9 [20.9 - 37.7] | 29.4 [25.4 - 39.4] | 33.3 [30.3 - 42.3] | 37.8 [35.2 - 46.1] | 42.5 [40.2 - 50.4] | 47.4 [45.2 - 55]   | 52.3 [50.2 - 59.7] |
| 76 | Mean (SD)       | 25.2 (5.6)         | 26.7 (4.8)         | 29.8 (4.1)         | 34 (3.6)           | 38.5 (3.3)         | 43.3 (3.2)         | 48.1 (3.1)         | 53.1 (3.1)         |
| 76 | Median [90% CR] | 24.6 [17.2 - 35.2] | 25.8 [20.7 - 35.9] | 28.8 [25.3 - 37.9] | 32.9 [30.2 - 41.2] | 37.5 [35.2 - 45.2] | 42.3 [40.2 - 49.6] | 47.2 [45.2 - 54.3] | 52.1 [50.2 - 59.2] |
| 77 | Mean (SD)       | 23.8 (5.3)         | 25.8 (4.4)         | 29.3 (3.7)         | 33.6 (3.3)         | 38.2 (3.1)         | 43 (3)             | 47.9 (2.9)         | 52.9 (2.9)         |
| 77 | Median [90% CR] | 23.3 [16.2 - 33.3] | 24.9 [20.5 - 34.3] | 28.3 [25.3 - 36.7] | 32.6 [30.2 - 40.2] | 37.3 [35.2 - 44.4] | 42.1 [40.2 - 49]   | 47 [45.2 - 53.7]   | 52 [50.1 - 58.6]   |

**Table 5A: SCA6: Expected age at onset (median [90%CR]) from birth and for different current age according to the genotype**

| CAG Repeat | At birth           |                    |                    |                    | Current Age        |                    |                    |                    |  |
|------------|--------------------|--------------------|--------------------|--------------------|--------------------|--------------------|--------------------|--------------------|--|
|            |                    | 35                 | 40                 | 45                 | 50                 | 55                 | 60                 | 65                 |  |
| 6 22       | 66.3 [48.7 - 90.1] | 66.3 [48.7 - 90.1] | 66.3 [49 - 90.2]   | 66.6 [50.2 - 90.3] | 67.3 [52.8 - 90.7] | 68.8 [56.7 - 91.5] | 71.2 [61.1 - 93]   | 74.3 [65.8 - 95]   |  |
| 6 24       | 55.3 [40.8 - 75.1] | 55.4 [41.2 - 75.2] | 55.9 [43 - 75.4]   | 57.1 [46.6 - 76.1] | 59.3 [50.9 - 77.4] | 62.5 [55.7 - 79.5] | 66.3 [60.5 - 82.2] | 70.5 [65.4 - 85.5] |  |
| 6 26       | 46.2 [34 - 62.8]   | 46.9 [36.9 - 63.2] | 48.7 [40.9 - 64.2] | 51.6 [45.6 - 66]   | 55.3 [50.4 - 68.7] | 59.5 [55.4 - 71.9] | 64 [60.3 - 75.7]   | 68.7 [65.3 - 79.8] |  |
| 6 28       | 38.6 [28.3 - 52.6] | 41.5 [35.6 - 54.3] | 44.9 [40.4 - 56.6] | 48.9 [45.3 - 59.7] | 53.4 [50.3 - 63.4] | 58.1 [55.2 - 67.5] | 62.9 [60.2 - 71.9] | 67.7 [65.2 - 76.5] |  |
| 8 22       | 62.6 [46.5 - 84.2] | 62.6 [46.5 - 84.2] | 62.7 [47 - 84.3]   | 63.1 [48.7 - 84.5] | 64.1 [52 - 85.1]   | 66.1 [56.2 - 86.2] | 68.9 [60.8 - 88]   | 72.5 [65.6 - 90.4] |  |
| 8 24       | 52.3 [38.9 - 70.3] | 52.4 [39.6 - 70.3] | 53.1 [42.1 - 70.7] | 54.7 [46.1 - 71.6] | 57.5 [50.7 - 73.3] | 61 [55.5 - 75.8]   | 65.1 [60.4 - 78.9] | 69.5 [65.4 - 82.4] |  |
| 8 26       | 43.6 [32.4 - 58.8] | 44.8 [36.3 - 59.4] | 47 [40.7 - 60.7]   | 50.3 [45.5 - 62.9] | 54.3 [50.3 - 65.9] | 58.7 [55.3 - 69.5] | 63.4 [60.3 - 73.5] | 68.1 [65.2 - 77.8] |  |
| 8 28       | 36.4 [26.9 - 49.3] | 40.3 [35.5 - 51.6] | 44 [40.3 - 54.2]   | 48.3 [45.3 - 57.7] | 52.9 [50.2 - 61.6] | 57.7 [55.2 - 65.9] | 62.5 [60.2 - 70.5] | 67.4 [65.2 - 75.2] |  |
| 10 22      | 59.1 [44.2 - 79]   | 59.1 [44.3 - 79]   | 59.3 [45.1 - 79.1] | 59.9 [47.5 - 79.4] | 61.4 [51.4 - 80.3] | 63.9 [55.9 - 81.8] | 67.2 [60.6 - 84]   | 71.1 [65.5 - 86.8] |  |
| 10 24      | 49.4 [36.9 - 66]   | 49.6 [38.3 - 66.1] | 50.6 [41.4 - 66.6] | 52.8 [45.8 - 67.9] | 56 [50.5 - 70]     | 60 [55.4 - 72.9]   | 64.3 [60.3 - 76.3] | 68.8 [65.3 - 80.2] |  |
| 10 26      | 41.2 [30.8 - 55.2] | 42.9 [35.9 - 56.1] | 45.6 [40.5 - 57.8] | 49.4 [45.4 - 60.5] | 53.6 [50.3 - 63.8] | 58.2 [55.2 - 67.7] | 62.9 [60.2 - 71.9] | 67.7 [65.2 - 76.4] |  |
| 10 28      | 34.4 [25.6 - 46.4] | 39.3 [35.4 - 49.4] | 43.3 [40.3 - 52.4] | 47.8 [45.2 - 56.1] | 52.5 [50.2 - 60.3] | 57.3 [55.2 - 64.8] | 62.2 [60.2 - 69.4] | 67.2 [65.2 - 74.2] |  |
| 12 22      | 55.8 [41.9 - 74.4] | 55.9 [42.1 - 74.4] | 56.2 [43.5 - 74.6] | 57.2 [46.7 - 75.1] | 59.2 [51 - 76.3]   | 62.2 [55.6 - 78.2] | 65.9 [60.5 - 80.8] | 70.1 [65.4 - 84]   |  |
| 12 24      | 46.6 [35 - 62.1]   | 47.1 [37.2 - 62.4] | 48.6 [41 - 63.2]   | 51.4 [45.6 - 64.9] | 55 [50.4 - 67.5]   | 59.2 [55.3 - 70.7] | 63.7 [60.3 - 74.4] | 68.3 [65.3 - 78.5] |  |
| 12 26      | 38.9 [29.1 - 52.1] | 41.4 [35.7 - 53.5] | 44.6 [40.4 - 55.6] | 48.7 [45.3 - 58.6] | 53.1 [50.2 - 62.3] | 57.8 [55.2 - 66.4] | 62.6 [60.2 - 70.8] | 67.5 [65.2 - 75.4] |  |
| 12 28      | 32.5 [24.2 - 43.8] | 38.6 [35.3 - 47.7] | 42.9 [40.2 - 51]   | 47.5 [45.2 - 55]   | 52.3 [50.2 - 59.4] | 57.1 [55.2 - 64]   | 62 [60.2 - 68.7]   | 67 [65.1 - 73.5]   |  |
| 14 22      | 52.7 [39.5 - 70.3] | 52.8 [40.1 - 70.4] | 53.4 [42.3 - 70.7] | 54.9 [46.2 - 71.5] | 57.5 [50.7 - 73.1] | 61 [55.5 - 75.5]   | 65 [60.4 - 78.5]   | 69.4 [65.3 - 82]   |  |
| 14 24      | 44 [33 - 58.8]     | 45 [36.4 - 59.3]   | 47 [40.7 - 60.5]   | 50.3 [45.5 - 62.6] | 54.3 [50.3 - 65.6] | 58.7 [55.3 - 69.1] | 63.3 [60.2 - 73.1] | 68 [65.2 - 77.4]   |  |
| 14 26      | 36.8 [27.4 - 49.3] | 40.3 [35.5 - 51.4] | 43.9 [40.3 - 53.9] | 48.2 [45.3 - 57.3] | 52.8 [50.2 - 61.2] | 57.6 [55.2 - 65.5] | 62.4 [60.2 - 70]   | 67.3 [65.2 - 74.7] |  |
| 14 28      | 30.7 [22.7 - 41.5] | 38.1 [35.3 - 46.4] | 42.6 [40.2 - 50.1] | 47.3 [45.2 - 54.3] | 52.1 [50.2 - 58.8] | 57 [55.1 - 63.5]   | 61.9 [60.1 - 68.3] | 66.9 [65.1 - 73.2] |  |
| 16 22      | 49.8 [37.2 - 66.7] | 50.1 [38.4 - 66.9] | 51 [41.5 - 67.4]   | 53.1 [45.8 - 68.6] | 56.3 [50.6 - 70.7] | 60.2 [55.4 - 73.5] | 64.4 [60.3 - 76.8] | 69 [65.3 - 80.6]   |  |
| 16 24      | 41.6 [31 - 55.8]   | 43.2 [36 - 56.7]   | 45.9 [40.5 - 58.4] | 49.5 [45.4 - 60.9] | 53.8 [50.3 - 64.2] | 58.3 [55.3 - 68.1] | 63 [60.2 - 72.3]   | 67.8 [65.2 - 76.7] |  |
| 16 26      | 34.7 [25.7 - 46.9] | 39.5 [35.4 - 49.8] | 43.4 [40.3 - 52.7] | 47.9 [45.2 - 56.4] | 52.6 [50.2 - 60.6] | 57.4 [55.2 - 65]   | 62.3 [60.2 - 69.6] | 67.2 [65.2 - 74.4] |  |
| 16 28      | 29 [21.3 - 39.5]   | 37.8 [35.2 - 45.6] | 42.4 [40.2 - 49.5] | 47.1 [45.2 - 53.8] | 52 [50.1 - 58.4]   | 56.9 [55.1 - 63.2] | 61.9 [60.1 - 68.1] | 66.9 [65.1 - 73]   |  |

**Table 5B: SCA6: Expected age at onset (mean (SD)) from birth and for different current age according to the genotype**

| CAG Repeat | At birth    |             |             |             | Current Age |            |             |            |  |
|------------|-------------|-------------|-------------|-------------|-------------|------------|-------------|------------|--|
|            |             | 35          | 40          | 45          | 50          | 55         | 60          | 65         |  |
| 6 22       | 67.4 (12.7) | 67.4 (12.7) | 67.5 (12.6) | 67.9 (12.3) | 68.9 (11.8) | 70.7 (11)  | 73.3 (10.2) | 76.5 (9.4) |  |
| 6 24       | 56.3 (10.6) | 56.5 (10.4) | 57.1 (10)   | 58.6 (9.3)  | 61.1 (8.5)  | 64.4 (7.7) | 68.2 (7.1)  | 72.3 (6.6) |  |
| 6 26       | 47 (8.8)    | 48.1 (8.2)  | 50.1 (7.4)  | 53.1 (6.6)  | 56.9 (6)    | 61 (5.5)   | 65.5 (5.1)  | 70.1 (4.9) |  |

|       |             |             |             |            |             |            |            |            |
|-------|-------------|-------------|-------------|------------|-------------|------------|------------|------------|
| 6 28  | 39.3 (7.5)  | 42.8 (6)    | 46.2 (5.3)  | 50.3 (4.7) | 54.7 (4.4)  | 59.3 (4.1) | 64.1 (3.9) | 68.9 (3.8) |
| 8 22  | 63.6 (11.6) | 63.6 (11.6) | 63.8 (11.4) | 64.4 (11)  | 65.7 (10.4) | 68 (9.5)   | 71 (8.8)   | 74.5 (8.1) |
| 8 24  | 53.1 (9.6)  | 53.4 (9.4)  | 54.3 (8.9)  | 56.2 (8.1) | 59.1 (7.3)  | 62.7 (6.6) | 66.8 (6.1) | 71.1 (5.7) |
| 8 26  | 44.4 (8.1)  | 45.9 (7.2)  | 48.3 (6.4)  | 51.7 (5.7) | 55.7 (5.1)  | 60.1 (4.7) | 64.7 (4.4) | 69.4 (4.2) |
| 8 28  | 37.1 (6.9)  | 41.5 (5.2)  | 45.2 (4.6)  | 49.5 (4.1) | 54 (3.8)    | 58.7 (3.6) | 63.5 (3.5) | 68.4 (3.4) |
| 10 22 | 60 (10.7)   | 60.1 (10.6) | 60.3 (10.4) | 61.2 (9.9) | 63 (9.1)    | 65.7 (8.3) | 69.1 (7.6) | 73 (7)     |
| 10 24 | 50.1 (8.9)  | 50.6 (8.6)  | 51.9 (7.9)  | 54.3 (7.1) | 57.6 (6.3)  | 61.5 (5.7) | 65.8 (5.3) | 70.3 (5)   |
| 10 26 | 41.9 (7.5)  | 44 (6.4)    | 46.9 (5.6)  | 50.7 (4.9) | 54.9 (4.5)  | 59.4 (4.2) | 64.1 (3.9) | 68.9 (3.8) |
| 10 28 | 35 (6.4)    | 40.4 (4.6)  | 44.4 (4)    | 48.9 (3.6) | 53.5 (3.4)  | 58.3 (3.2) | 63.2 (3.1) | 68.1 (3.1) |
| 12 22 | 56.7 (10)   | 56.8 (9.9)  | 57.2 (9.5)  | 58.5 (8.9) | 60.8 (8.1)  | 64 (7.3)   | 67.7 (6.6) | 71.8 (6.1) |
| 12 24 | 47.3 (8.3)  | 48.1 (7.8)  | 49.9 (7)    | 52.8 (6.2) | 56.5 (5.6)  | 60.6 (5.1) | 65 (4.7)   | 69.7 (4.4) |
| 12 26 | 39.5 (7)    | 42.6 (5.7)  | 45.9 (4.9)  | 49.9 (4.4) | 54.3 (4)    | 58.9 (3.7) | 63.7 (3.6) | 68.5 (3.4) |
| 12 28 | 33 (6)      | 39.7 (4.1)  | 43.9 (3.6)  | 48.5 (3.3) | 53.2 (3.1)  | 58 (3)     | 62.9 (2.9) | 67.9 (2.8) |
| 14 22 | 53.5 (9.4)  | 53.7 (9.3)  | 54.5 (8.8)  | 56.3 (8)   | 59.1 (7.2)  | 62.7 (6.5) | 66.7 (5.9) | 71 (5.5)   |
| 14 24 | 44.7 (7.9)  | 46 (7.1)    | 48.3 (6.3)  | 51.7 (5.6) | 55.6 (5)    | 60 (4.6)   | 64.5 (4.3) | 69.2 (4.1) |
| 14 26 | 37.4 (6.7)  | 41.4 (5.1)  | 45.1 (4.5)  | 49.3 (4)   | 53.9 (3.7)  | 58.6 (3.5) | 63.4 (3.3) | 68.3 (3.2) |
| 14 28 | 31.2 (5.8)  | 39.1 (3.7)  | 43.5 (3.3)  | 48.2 (3.1) | 53 (2.9)    | 57.9 (2.8) | 62.8 (2.8) | 67.7 (2.7) |
| 16 22 | 50.6 (9.1)  | 51 (8.7)    | 52.3 (8.1)  | 54.6 (7.3) | 57.9 (6.5)  | 61.7 (5.9) | 66 (5.5)   | 70.4 (5.1) |
| 16 24 | 42.3 (7.6)  | 44.4 (6.5)  | 47.2 (5.7)  | 50.9 (5.1) | 55.1 (4.6)  | 59.5 (4.3) | 64.2 (4)   | 69 (3.9)   |
| 16 26 | 35.3 (6.5)  | 40.6 (4.7)  | 44.6 (4.1)  | 49 (3.7)   | 53.6 (3.5)  | 58.4 (3.3) | 63.3 (3.2) | 68.2 (3.1) |
| 16 28 | 29.5 (5.6)  | 38.7 (3.4)  | 43.3 (3.1)  | 48 (2.9)   | 52.9 (2.8)  | 57.8 (2.7) | 62.7 (2.7) | 67.7 (2.7) |

---

**Figure 1: Model validation**

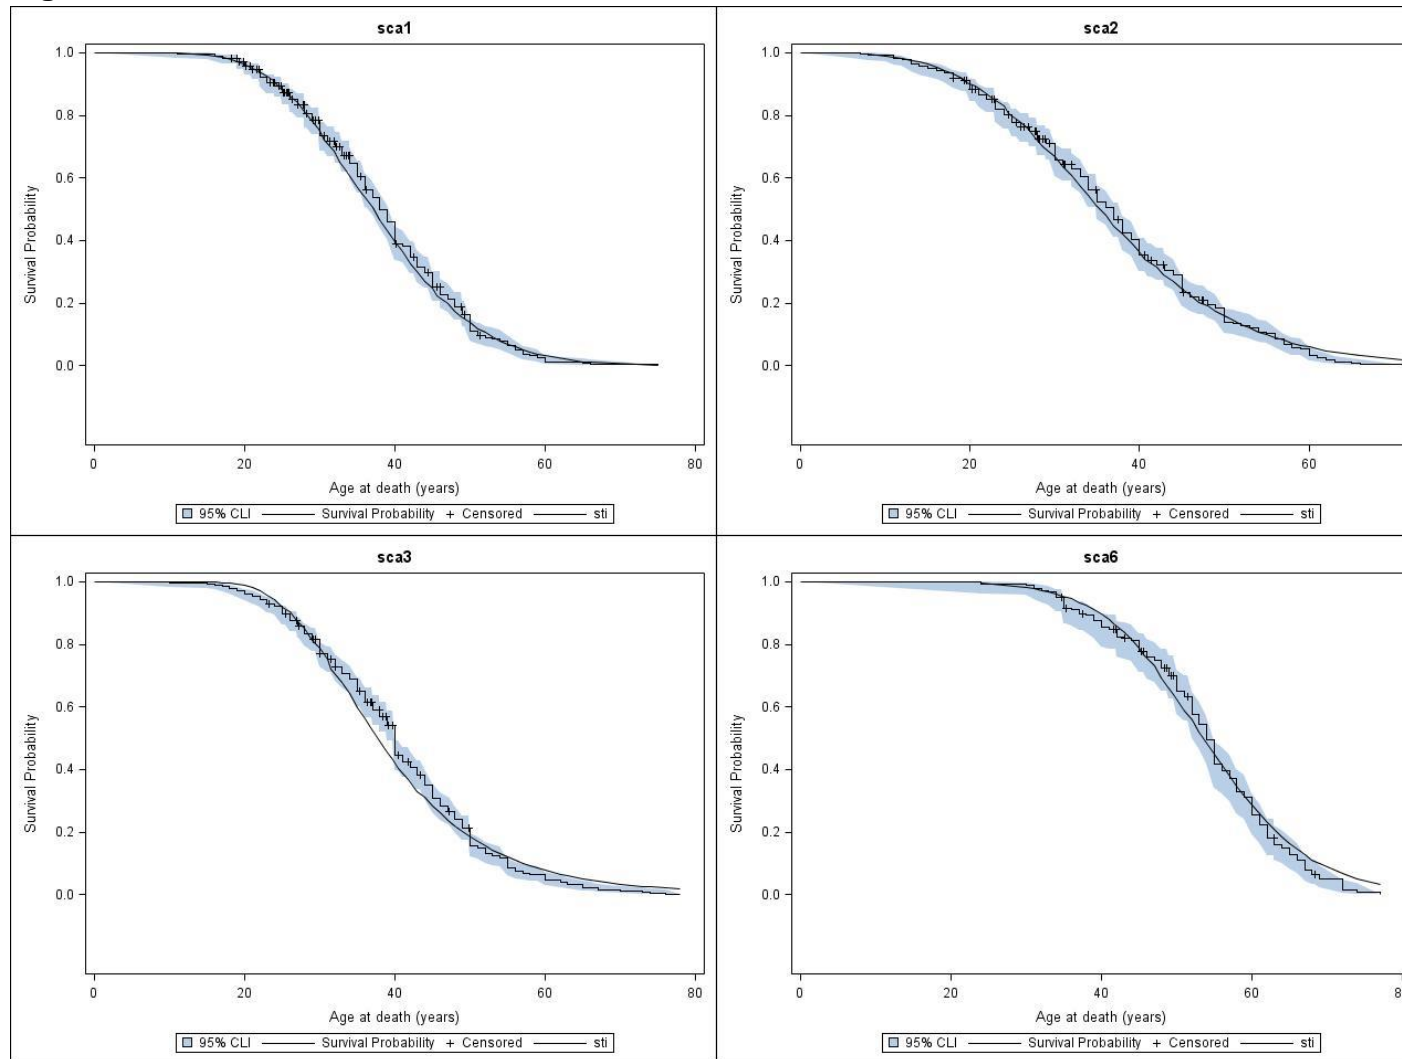

The step line is the Kaplan-Meier curve obtained from the genotyped sample, with in blue the 95% Confidence interval. The straight solid line is the mean of the estimated survival function of the individuals obtained by the cross-over method.

**Figure 2: Sensitivity analysis**

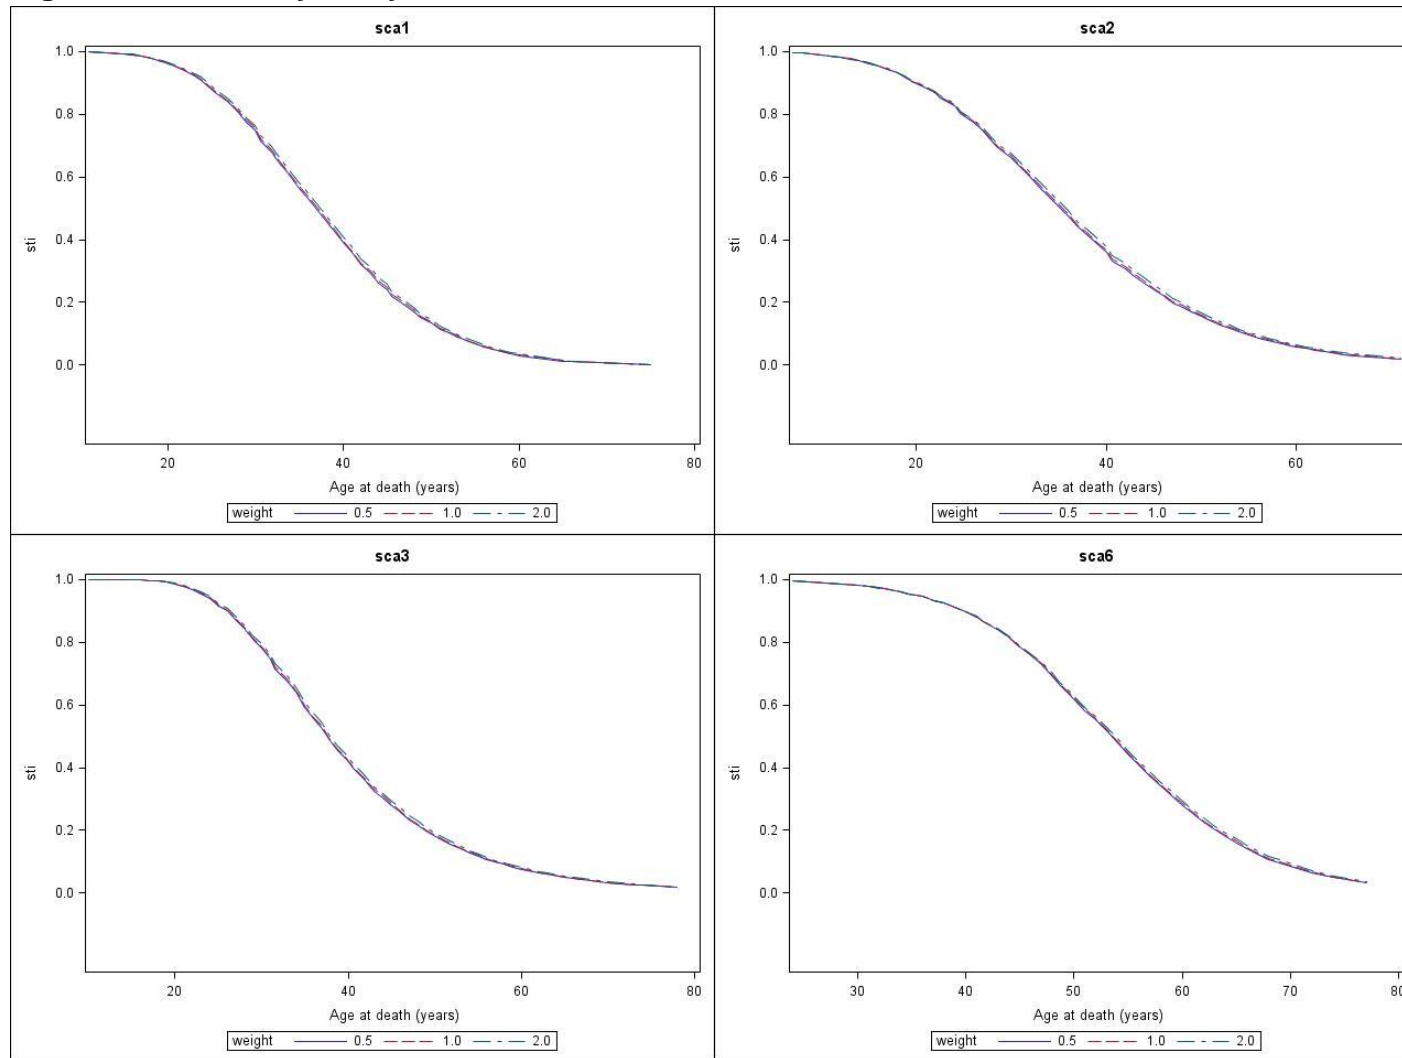

Mean of the estimated survival function plotted with all individuals (weight=1), proportion of unaffected multiplied by 0.5 (weight=0.5) and by 2 (weight=2).
